# Supplementary material
Source: PubMed Central journal article supplement (PMC8513406)

**APPENDIX I. Additional aggregate trendlines**

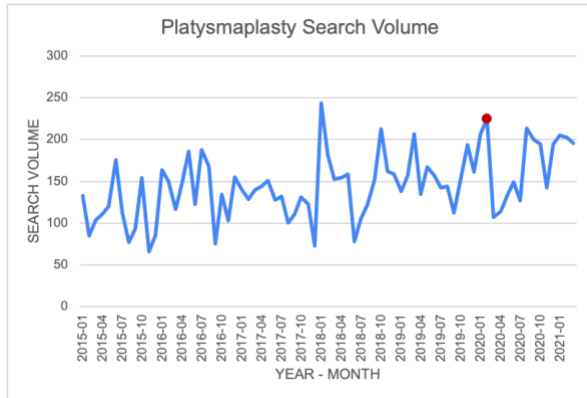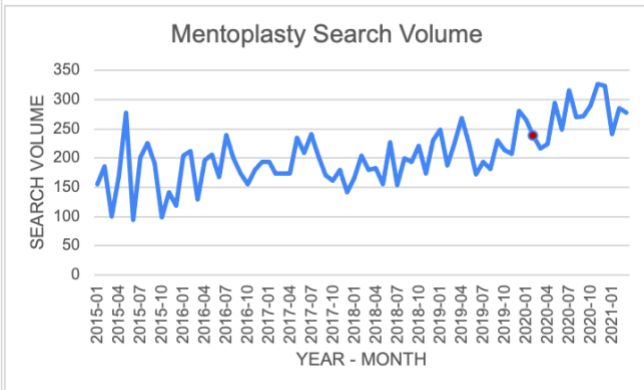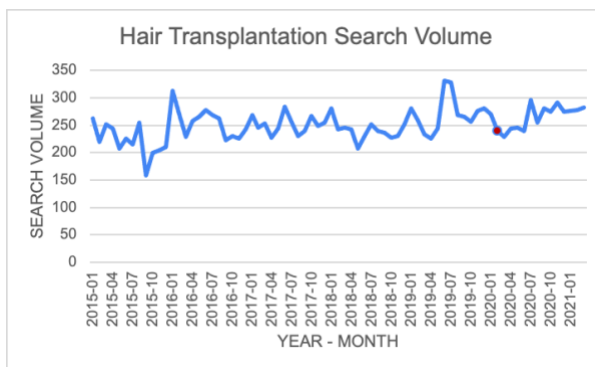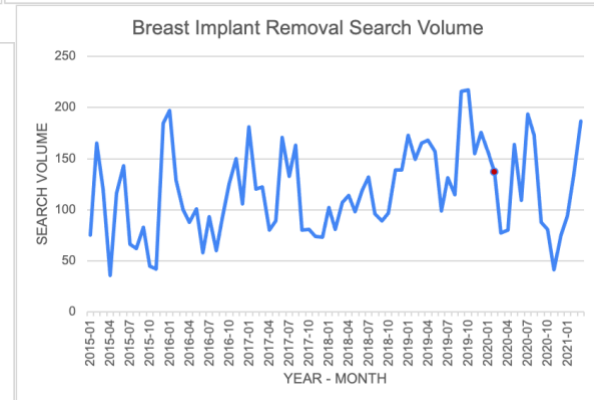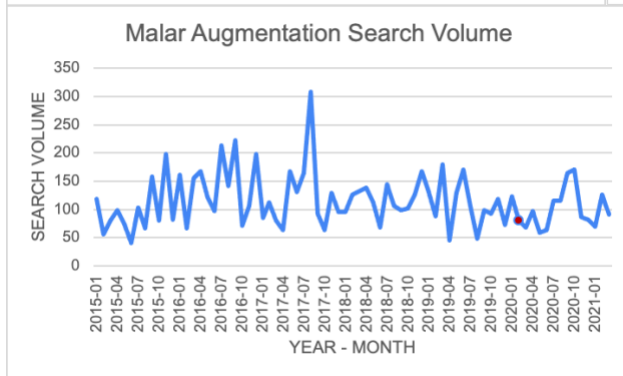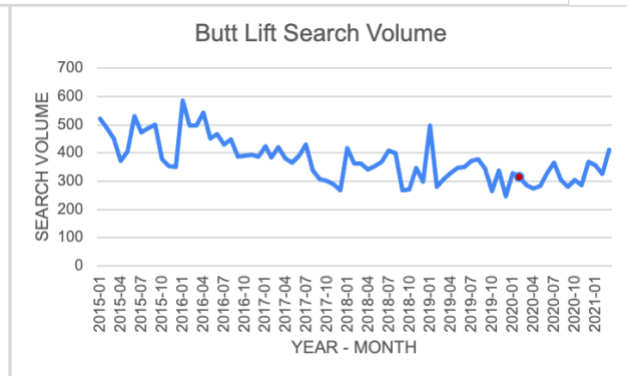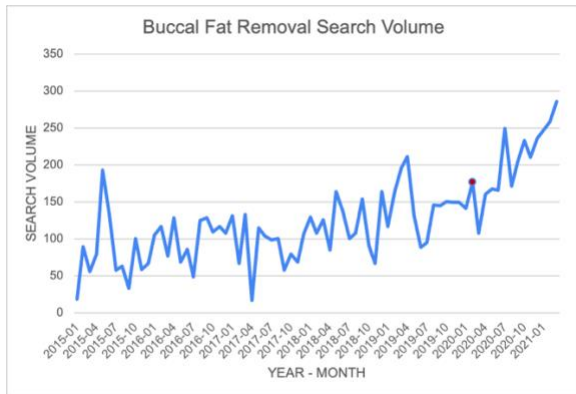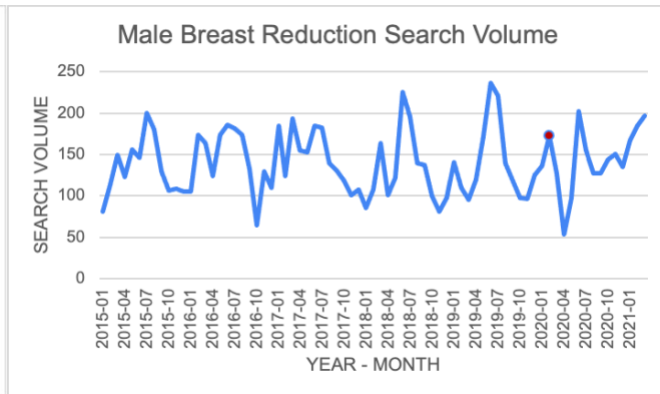

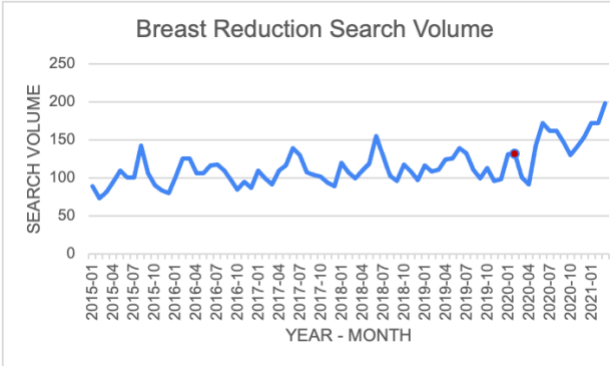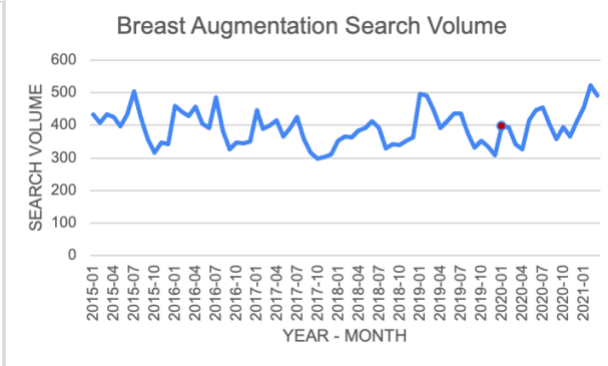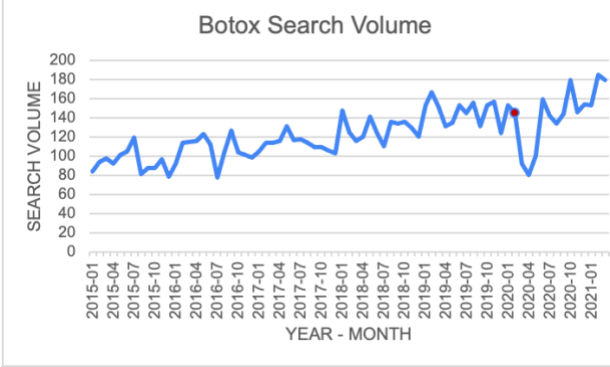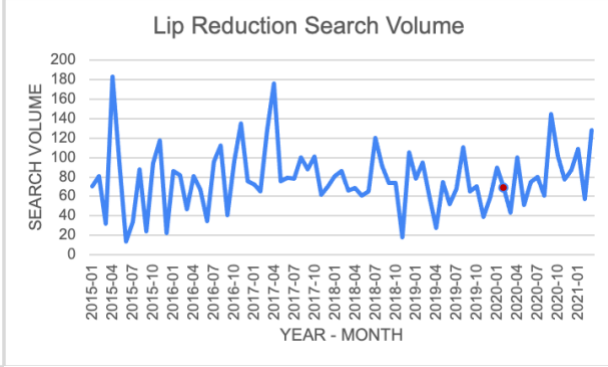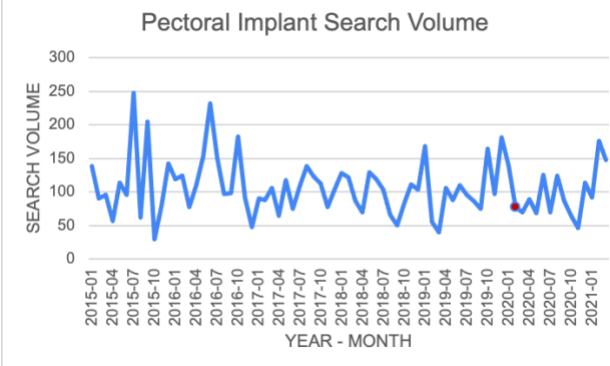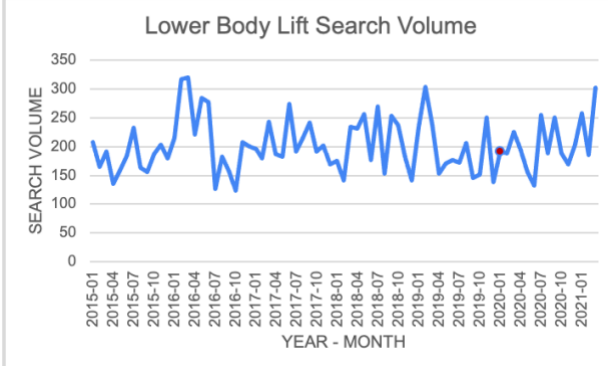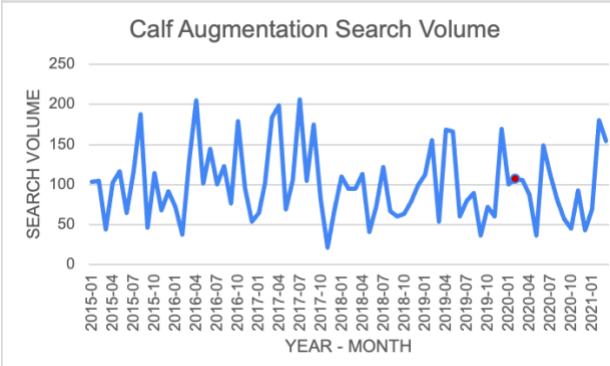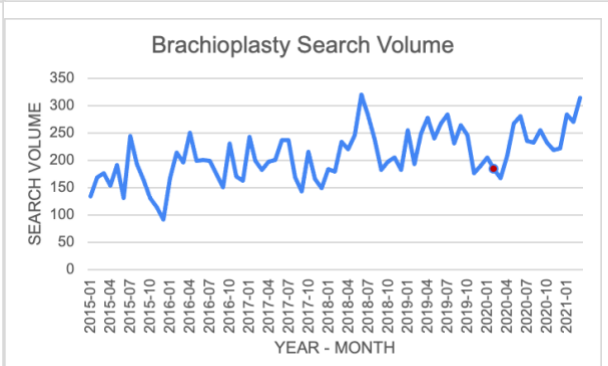

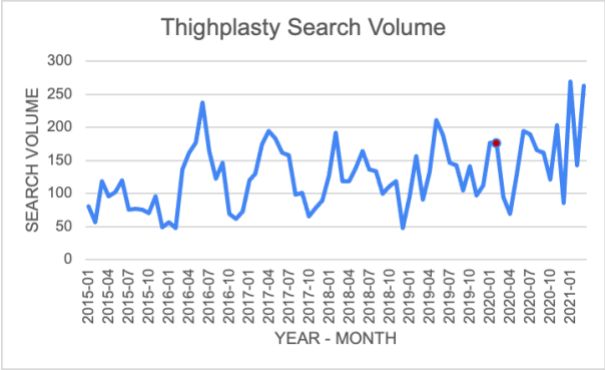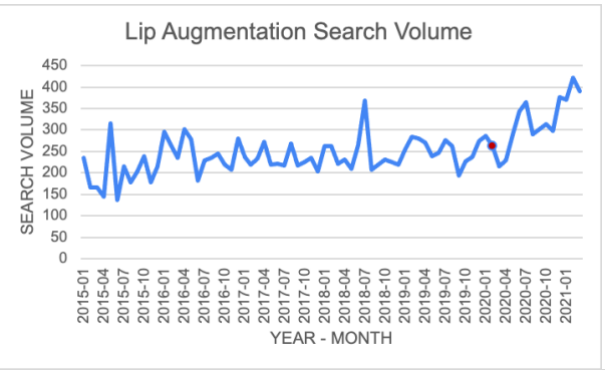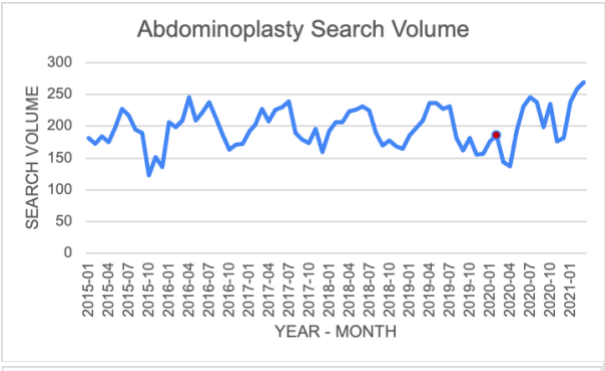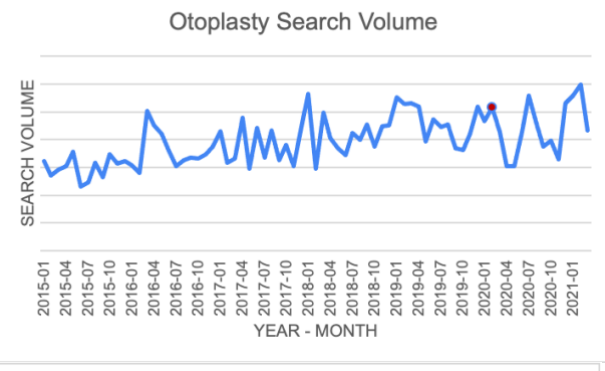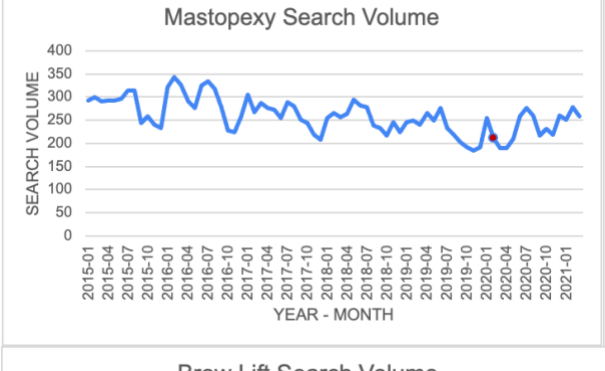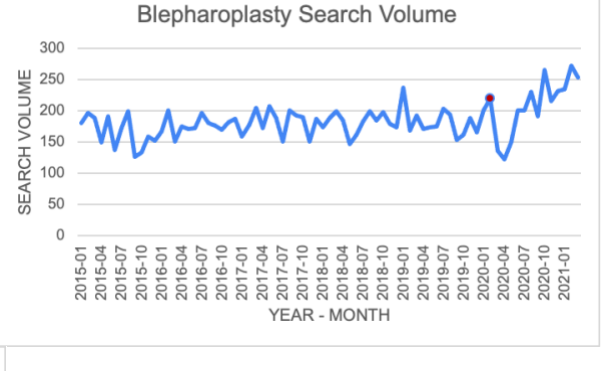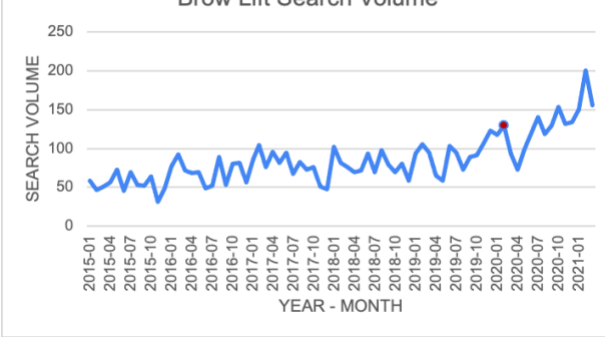

Supplement: sjab347_suppl_Supplementary_Appendix.pdf [file sjab347_suppl_Supplementary_Appendix.pdf]
